# Supplementary material for: Implications of the Propagation Method for the Phytochemistry of Nepeta cataria L. throughout a Growing Season
Source: MDPI journal article supplement (doi:10.3390/molecules29092001), 2024-04-26
Supplement: s1 [file s1]

Supplementary materials

# Implications of the Propagation Method for the Phytochemistry of *Nepeta cataria* L. throughout a Growing Season

Erik Nunes Gomes <sup>1,2\*</sup>, Bo Yuan<sup>1</sup>, Harna K. Patel <sup>1</sup>, Anthony Lockhart <sup>1,3,4</sup>, Christian A. Wyenandt <sup>1,5</sup>, Qingli Wu <sup>1,3,4</sup>, James E. Simon <sup>1,3,4\*</sup>

<sup>1</sup> New Use Agriculture and Natural Plant Products Program, Department of Plant Biology, Rutgers University, New Brunswick, NJ 08901, USA

<sup>2</sup> Federal Agency for Support and Evaluation of Graduate Education (CAPES), Ministry of Education of Brazil, Brasilia 70040-020, DF, Brazil

<sup>3</sup> Rutgers Core Facility for Natural Products and Bioanalysis, Rutgers University, New Brunswick, NJ 08901, USA

<sup>4</sup> Department of Medicinal Chemistry, Ernest Mario School of Pharmacy, Rutgers University, Piscataway, NJ 08854, USA

<sup>5</sup> New Jersey Agricultural Experiment Station, Rutgers Agricultural Research and Extension Center (RAREC), Department of Plant Biology, Rutgers University, Bridgeton, NJ 08302, USA

\* Correspondence: erik.gomes@rutgers.edu (E.N.G.); jimsimon@sebs.rutgers.edu (J.E.S.)

**Table S1.** Analysis of variance (ANOVA) table for contents of *E,Z*-nepetalactone (*E,Z*-NL), *Z,E*-nepetalactone (*Z,E*-NL), total nepetalactones (Total NL), nepetalic acid (NA), dihydronepetalactone (DHNL), nepetalactam (NT), biomass accumulation (biomass) and total nepetalactone yield (NL yield) in catnip plants propagated by different methods and harvested at different times within the growing season. Pittstown, State of New Jersey, United States.

| Source of variation | DF | Sum of squares        |                    |                       |            |                     |                    |                     |                        |
|---------------------|----|-----------------------|--------------------|-----------------------|------------|---------------------|--------------------|---------------------|------------------------|
|                     |    | <i>E,Z</i> -NL        | <i>Z,E</i> -NL     | Total NL              | NA         | DHNL                | NT                 | Biomass             | NL yield               |
| Blocks              | 2  | 17357.2 <sup>ns</sup> | 52.1 <sup>ns</sup> | 19371.8 <sup>ns</sup> | 6536.9**   | 439.5 <sup>ns</sup> | 0.65*              | 350.5 <sup>ns</sup> | 168699.4 <sup>ns</sup> |
| Propagule (p)       | 1  | 566399.8**            | 5.3 <sup>ns</sup>  | 601921.1**            | 21098.1**  | 30040.9**           | 0.02 <sup>ns</sup> | 16628.1*            | 3714516.1*             |
| Whole-Plot error    | 2  | 2595.1                | 3.0                | 2954.5                | 42.2       | 167.3               | 0.02               | 1555.2              | 133410.8               |
| Weeks (w)           | 5  | 3053547.1**           | 21565.4**          | 3656447.8**           | 695683.1** | 74016.1**           | 727.3**            | 132262.9**          | 5846481.9**            |
| Interaction p×w     | 5  | 427632.2**            | 2988.3**           | 496172.9**            | 27671.0**  | 78367.2**           | 3.2**              | 10318.4**           | 3092197.7**            |
| Split-Plot Error    | 20 | 24505.1               | 315.3              | 31715.5               | 6724.2     | 1044.5              | 1.7                | 9293.8              | 700279.2               |
| Total               | 35 | 4092036.5             | 24929.4            | 4808583.7             | 757755.7   | 184075.5            | 732.9              | 170408.9            | 13655585.3             |

\* Statistically significant ( $p \leq 0.05$ ); \*\* Statistically significant ( $p \leq 0.01$ ); <sup>ns</sup> Not statistically different ( $p > 0.05$ ); DF: degrees of freedom.

## Supplementary materials

Gomes et al. (2024).

Implications of propagation method on the phytochemistry of *Nepeta cataria* L. throughout a growing season

**Table S2.** Analysis of variance (ANOVA) table for contents of *E,Z*-nepetalactone (*E,Z*-NL), *Z,E*-nepetalactone (*Z,E*-NL), total nepetalactones (Total NL), nepetalic acid (NA), dihydronepetalactone (DHNL), nepetalactam (NT), biomass accumulation (biomass) and total nepetalactone yield (NL yield) in catnip plants propagated by different methods and harvested at different times within the growing season. Upper Deerfield, State of New Jersey, United States.

| Source of variation | DF | Sum of squares |                    |             |                      |                     |                    |                     |                       |
|---------------------|----|----------------|--------------------|-------------|----------------------|---------------------|--------------------|---------------------|-----------------------|
|                     |    | <i>E,Z</i> -NL | <i>Z,E</i> -NL     | Total NL    | NA                   | DHNL                | NT                 | Biomass             | NL yield              |
| Blocks              | 2  | 42779.1*       | 56.4 <sup>ns</sup> | 50494.4*    | 7252.8 <sup>ns</sup> | 235.4 <sup>ns</sup> | 0.21 <sup>ns</sup> | 37.1 <sup>ns</sup>  | 12786.0 <sup>ns</sup> |
| Propagule (p)       | 1  | 62451.5*       | 18.4 <sup>ns</sup> | 66455.4*    | 129535.9**           | 5538.1*             | 0.13 <sup>ns</sup> | 280.6 <sup>ns</sup> | 426.6 <sup>ns</sup>   |
| Whole-Plot error    | 2  | 1905.1         | 20.2               | 2474.8      | 814.1                | 284.3               | 0.14               | 548.4               | 34962.7               |
| Weeks (w)           | 5  | 1948263.8**    | 5106.9**           | 2143273.9** | 162753.4**           | 19759.9**           | 99.5**             | 27072.9**           | 1455585.9**           |
| Interaction p×w     | 5  | 905149.9**     | 836.5**            | 917602.4**  | 107678.8**           | 4311.8**            | 1.68**             | 141.0 <sup>ns</sup> | 237512.6**            |
| Split-Plot Error    | 20 | 58673.5        | 215.8              | 68095.2     | 7525.7               | 341.6               | 0.57               | 2093.6              | 140383.8              |
| Total               | 35 | 3019222.9      | 6254.4             | 3248396.4   | 415560.6             | 30471.1             | 102.3              | 30173.5             | 1881657.7             |

\* Statistically significant ( $p \leq 0.05$ ); \*\* Statistically significant ( $p \leq 0.01$ ); <sup>ns</sup> Not statistically different ( $p > 0.05$ ); DF: degrees of freedom.

### Supplementary materials

Gomes et al. (2024).

Implications of propagation method on the phytochemistry of *Nepeta cataria* L. throughout a growing season

**Table S3.** Unfolding of interaction effects between propagation methods and harvest times on contents of *E,Z*-nepetalactone, *Z,E*-nepetalactone, total nepetalactones, nepetalic acid, dihydronepetalactone, nepetalactam, biomass accumulation and total nepetalactone yield (NL yield) in catnip plants. Pittstown, State of New Jersey, United States.

| <b><i>E,Z</i>-nepetalactone (mg per 100 g)<sup>1</sup></b> |                             |           |           |            |           |           |
|------------------------------------------------------------|-----------------------------|-----------|-----------|------------|-----------|-----------|
| <i>Propagule</i>                                           | <i>Weeks after planting</i> |           |           |            |           |           |
|                                                            | 3                           | 6         | 9         | 11         | 13        | 15        |
| Seed                                                       | 304.8 aD                    | 1245.7 aA | 1160.6 aA | 802.4 aB   | 660.5 aC  | 640.6 aC  |
| Cutting                                                    | 335.6 aC                    | 1126.9 bA | 645.4 bB  | 344.6 bC   | 630.6 aB  | 226.2 bD  |
| <b><i>Z,E</i>-nepetalactone (mg per 100 g)</b>             |                             |           |           |            |           |           |
| <i>Propagule</i>                                           | <i>Weeks after planting</i> |           |           |            |           |           |
|                                                            | 3                           | 6         | 9         | 11         | 13        | 15        |
| Seed                                                       | 4.9 aC                      | 38.6 bB   | 75.1 aA   | 34.5 aB    | 10.6 aC   | 14.9 aC   |
| Cutting                                                    | 3.3 aD                      | 75.7 aA   | 61.1 bB   | 14.7 bC    | 9.5 aCD   | 9.6 aCD   |
| <b>Total nepetalactones (mg per 100 g)</b>                 |                             |           |           |            |           |           |
| <i>Propagule</i>                                           | <i>Weeks after planting</i> |           |           |            |           |           |
|                                                            | 3                           | 6         | 9         | 11         | 13        | 15        |
| Seed                                                       | 314.3 aD                    | 1305.4 aA | 1268.3 aA | 861.3 aB   | 679.9 aC  | 668.6 aC  |
| Cutting                                                    | 341.1 aCD                   | 1223.3 bA | 721.2 bB  | 367.1 bC   | 649.3 aB  | 244.2 bD  |
| <b>Nepetalic acid (mg per 100 g)</b>                       |                             |           |           |            |           |           |
| <i>Propagule</i>                                           | <i>Weeks after planting</i> |           |           |            |           |           |
|                                                            | 3                           | 6         | 9         | 11         | 13        | 15        |
| Seed                                                       | 279.9 aD                    | 614.3 aA  | 451.2 aB  | 397.5 aC   | 209.8 aE  | 190.7 aE  |
| Cutting                                                    | 304.6 aC                    | 520.5 bA  | 438.9 aB  | 261.3 bC   | 202.8 aD  | 124.7 bE  |
| <b>Dihydronepetalactone (mg per 100 g)</b>                 |                             |           |           |            |           |           |
| <i>Propagule</i>                                           | <i>Weeks after planting</i> |           |           |            |           |           |
|                                                            | 3                           | 6         | 9         | 11         | 13        | 15        |
| Seed                                                       | 184.4 aA                    | 81.8 bD   | 149.7 bB  | 147.9 bB   | 101.1 aC  | 86.5 bCD  |
| Cutting                                                    | 90.1 bD                     | 204.4 aB  | 343.8 aA  | 175.8 aC   | 98.1 aD   | 185.9 aBC |
| <b>Nepetalactam (mg per 100 g)</b>                         |                             |           |           |            |           |           |
| <i>Propagule</i>                                           | <i>Weeks after planting</i> |           |           |            |           |           |
|                                                            | 3                           | 6         | 9         | 11         | 13        | 15        |
| Seed                                                       | 6.1 aB                      | 13.5 bA   | 5.9 aB    | 1.8 aC     | 0.8 aD    | 0.7 bD    |
| Cutting                                                    | 4.9 bB                      | 14.1 aA   | 5.7 aB    | 2.2 aC     | 0.7 aD    | 1.4 aD    |
| <b>Biomass (g per plant)</b>                               |                             |           |           |            |           |           |
| <i>Propagule</i>                                           | <i>Weeks after planting</i> |           |           |            |           |           |
|                                                            | 3                           | 6         | 9         | 11         | 13        | 15        |
| Seed                                                       | 24.4 aC                     | 51.4 aC   | 143.7 aB  | 211.1 aA   | 194.5 aAB | 197.8 aAB |
| Cutting                                                    | 7.9 aD                      | 62.5 aCD  | 82.8 bBC  | 119.8 bAB  | 159.9 aA  | 131.9 bAB |
| <b>Total nepetalactone yield (mg per plant)</b>            |                             |           |           |            |           |           |
| <i>Propagule</i>                                           | <i>Weeks after planting</i> |           |           |            |           |           |
|                                                            | 3                           | 6         | 9         | 11         | 13        | 15        |
| Seed                                                       | 77.1 aD                     | 668.3 aC  | 1833.1 aA | 1821.0 aA  | 1323.3 aB | 1319.9 aB |
| Cutting                                                    | 26.9 aC                     | 770.4 aAB | 595.4 bAB | 438.26 bBC | 1036.5 aA | 320.4 bBC |

<sup>1</sup>Means followed by the same letter do not differ statistically according to the Tukey test at the 5% probability level. Lowercase letters indicate differences between methods of propagation within the same harvest date (column) and uppercase letters indicate differences among different dates of harvesting within the same propagation method (row).

### Supplementary materials

Gomes et al. (2024).

Implications of propagation method on the phytochemistry of *Nepeta cataria* L. throughout a growing season

**Table S4.** Unfolding of interaction effects between propagation methods and harvest times on contents of *E,Z*-nepetalactone, *Z,E*-nepetalactone, total nepetalactones, nepetalic acid, dihydronepetalactone, nepetalactam, biomass accumulation and total nepetalactone yield (NL yield) in catnip plants. Upper Deerfield, State of New Jersey, United States.

| <b><i>E,Z</i>-nepetalactone (mg per 100 g)<sup>1</sup></b> |                             |           |           |           |           |           |
|------------------------------------------------------------|-----------------------------|-----------|-----------|-----------|-----------|-----------|
| <i>Propagule</i>                                           | <i>Weeks after planting</i> |           |           |           |           |           |
|                                                            | 3                           | 6         | 9         | 11        | 13        | 15        |
| Seed                                                       | 305.7 bC                    | 399.4 bBC | 1157.9 aA | 1192.0 aA | 501.9 bB  | 445.7 bB  |
| Cutting                                                    | 663.8 aB                    | 491.5 aC  | 735.1 bB  | 950.7 bA  | 949.5 aA  | 711.8 aB  |
| <b><i>Z,E</i>-nepetalactone (mg per 100 g)</b>             |                             |           |           |           |           |           |
| <i>Propagule</i>                                           | <i>Weeks after planting</i> |           |           |           |           |           |
|                                                            | 3                           | 6         | 9         | 11        | 13        | 15        |
| Seed                                                       | 7.8 bD                      | 11.8 aD   | 28.6 bC   | 36.1 aBC  | 38.4 aAB  | 45.9 aA   |
| Cutting                                                    | 23.2 aD                     | 9.7 aE    | 41.0 aAB  | 33.3 aBC  | 25.6 bCD  | 44.3 aA   |
| <b>Total nepetalactones (mg per 100 g)</b>                 |                             |           |           |           |           |           |
| <i>Propagule</i>                                           | <i>Weeks after planting</i> |           |           |           |           |           |
|                                                            | 3                           | 6         | 9         | 11        | 13        | 15        |
| Seed                                                       | 318.5 bC                    | 416.6 aBC | 1213.9 aA | 1247.7 aA | 548.3 bB  | 510.4 bB  |
| Cutting                                                    | 698.0 aB                    | 508.3 aC  | 798.6 bB  | 997.1 bA  | 993.1 aA  | 775.9 aB  |
| <b>Nepetalic acid (mg per 100 g)</b>                       |                             |           |           |           |           |           |
| <i>Propagule</i>                                           | <i>Weeks after planting</i> |           |           |           |           |           |
|                                                            | 3                           | 6         | 9         | 11        | 13        | 15        |
| Seed                                                       | 383.2 bB                    | 280.5 bC  | 264.6 bCD | 475.9 aA  | 215.2 bD  | 363.3 aB  |
| Cutting                                                    | 629.8 aA                    | 379.2 aD  | 407.3 aCD | 437.4 bBC | 471.2 aB  | 377.6 aD  |
| <b>Dihydronepetalactone (mg per 100 g)</b>                 |                             |           |           |           |           |           |
| <i>Propagule</i>                                           | <i>Weeks after planting</i> |           |           |           |           |           |
|                                                            | 3                           | 6         | 9         | 11        | 13        | 15        |
| Seed                                                       | 75.3 aA                     | 72.3 bA   | 70.7 bA   | 48.6 bB   | 36.0 bC   | 41.7 aBC  |
| Cutting                                                    | 86.6 aC                     | 132.6 aA  | 112.6 aB  | 66.1 aD   | 61.9 aD   | 33.5 aE   |
| <b>Nepetalactam (mg per 100 g)</b>                         |                             |           |           |           |           |           |
| <i>Propagule</i>                                           | <i>Weeks after planting</i> |           |           |           |           |           |
|                                                            | 3                           | 6         | 9         | 11        | 13        | 15        |
| Seed                                                       | 2.3 aC                      | 4.9 aB    | 5.5 aA    | 2.6 bC    | 1.6 aD    | 0.8 aE    |
| Cutting                                                    | 1.6 bD                      | 4.7 aB    | 5.2 aA    | 3.2 aC    | 1.3 aDE   | 1.1 aE    |
| <b>Biomass (g per plant)#</b>                              |                             |           |           |           |           |           |
| <i>Propagule</i>                                           | <i>Weeks after planting</i> |           |           |           |           |           |
|                                                            | 3                           | 6         | 9         | 11        | 13        | 15        |
| Seed                                                       | 2.1                         | 8.3       | 25.9      | 47.3      | 52.3      | 84.7      |
| Cutting                                                    | 1.8                         | 4.4       | 18.0      | 35.0      | 50.0      | 77.8      |
| <b>Total nepetalactone yield (mg per plant)</b>            |                             |           |           |           |           |           |
| <i>Propagule</i>                                           | <i>Weeks after planting</i> |           |           |           |           |           |
|                                                            | 3                           | 6         | 9         | 11        | 13        | 15        |
| Seed                                                       | 6.6 aC                      | 34.4 aC   | 310.8 aB  | 591.7 aA  | 288.1 bB  | 430.1 bAB |
| Cutting                                                    | 12.4 aD                     | 22.3 aD   | 143.5 bCD | 348.4 bBC | 494.9 aAB | 598.9 aA  |

<sup>1</sup>Means followed by the same letter do not differ statistically according to the Tukey test at the 5% probability level. Lowercase letters indicate differences between methods of propagation within the same harvest date (column) and uppercase letters indicate differences among different dates of harvesting within the same propagation method (row).#Interaction effect not statistically significant.

## Supplementary materials

Gomes et al. (2024).

Implications of propagation method on the phytochemistry of *Nepeta cataria* L. throughout a growing season

**Table S5.** Analysis of variance (ANOVA) table for contents of caffeic acid (Ca), rosmarinic acid (Ra), luteolin (Lu) and apigenin (Ap) in catnip plants propagated by different methods and harvested at different times within the growing season. Pittstown, State of New Jersey, United States.

| Source of variation | DF | Sum of Squares     |                     |                   |                    |
|---------------------|----|--------------------|---------------------|-------------------|--------------------|
|                     |    | Ca                 | Ra                  | Lu                | Ap                 |
| Blocks              | 2  | 2.5 <sup>ns</sup>  | 188.4 <sup>ns</sup> | 8.9 <sup>ns</sup> | 1.1 <sup>ns</sup>  |
| Propagule (p)       | 1  | 437.9**            | 40997.8**           | 94.9*             | 21.6 <sup>ns</sup> |
| Whole-Plot error    | 2  | 1.2                | 442.7               | 6.1               | 2.8                |
| Weeks (w)           | 5  | 201.2**            | 304389.7**          | 145.8**           | 88.1**             |
| Interaction p×w     | 5  | 15.7 <sup>ns</sup> | 104049.1**          | 371.5**           | 76.6**             |
| Split-Plot Error    | 20 | 58.3               | 1969.9              | 83.8              | 17.9               |
| Total               | 35 | 716.8              | 452037.6            | 711.1             | 208.1              |

\* Statistically significant ( $p \leq 0.05$ ); \*\* Statistically significant ( $p \leq 0.01$ ); <sup>ns</sup> Not statistically different ( $p > 0.05$ ); DF: degrees of freedom.

**Table S6.** Analysis of variance (ANOVA) table for contents of caffeic acid (Ca), rosmarinic acid (Ra), luteolin (Lu) and apigenin (Ap) in catnip plants propagated by different methods and harvested at different times within the growing season. Upper Deerfield, State of New Jersey, United States.

| Source of variation | DF | Sum of Squares      |                      |                    |                    |
|---------------------|----|---------------------|----------------------|--------------------|--------------------|
|                     |    | Ca                  | Ra                   | Lu                 | Ap                 |
| Blocks              | 2  | 19.4 <sup>ns</sup>  | 610.9 <sup>ns</sup>  | 7.6 <sup>ns</sup>  | 6.2 <sup>ns</sup>  |
| Propagule (p)       | 1  | 0.1 <sup>ns</sup>   | 6579.6 <sup>ns</sup> | 8.0 <sup>ns</sup>  | 4.1 <sup>ns</sup>  |
| Whole-Plot error    | 2  | 2.9                 | 1501.1               | 1.3                | 0.9                |
| Weeks (w)           | 5  | 122.7**             | 73286.8**            | 195.2**            | 70.6**             |
| Interaction p×w     | 5  | 47.58 <sup>ns</sup> | 7704.7**             | 42.4 <sup>ns</sup> | 24.5 <sup>ns</sup> |
| Split-Plot Error    | 20 | 87.0                | 7299.1               | 78.9               | 38.7               |
| Total               | 35 | 279.8               | 96982.3              | 333.5              | 145.1              |

\* Statistically significant ( $p \leq 0.05$ ); \*\* Statistically significant ( $p \leq 0.01$ ); <sup>ns</sup> Not statistically different ( $p > 0.05$ ); DF: degrees of freedom.

### Supplementary materials

Gomes et al. (2024).

Implications of propagation method on the phytochemistry of *Nepeta cataria* L. throughout a growing season

**Table S7.** Unfolding of interaction effects between propagation methods and harvest times on contents of caffeic acid (Ca), rosmarinic acid (Ra), luteolin (Lu) and apigenin (Ap) in catnip plants. Pittstown, State of New Jersey, United States.

| Caffeic acid (mg per 100 g)#                |                      |          |          |          |          |          |
|---------------------------------------------|----------------------|----------|----------|----------|----------|----------|
| Propagule                                   | Weeks after planting |          |          |          |          |          |
|                                             | 3                    | 6        | 9        | 11       | 13       | 15       |
| Seed                                        | 12.6                 | 16.6     | 14.5     | 14.9     | 20.4     | 14.2     |
| Cutting                                     | 6.8                  | 7.8      | 5.9      | 7.9      | 13.6     | 9.1      |
| Rosmarinic acid (mg per 100 g) <sup>1</sup> |                      |          |          |          |          |          |
| Propagule                                   | Weeks after planting |          |          |          |          |          |
|                                             | 3                    | 6        | 9        | 11       | 13       | 15       |
| Seed                                        | 2.7 aE               | 8.7 aE   | 36.6 aD  | 192.7 aB | 410.4 aA | 127.3 aC |
| Cutting                                     | 2.2 aD               | 24.4 aCD | 35.2 aBC | 59.6 bB  | 129.8 bA | 122.2 aA |
| Luteolin (mg per 100 g)                     |                      |          |          |          |          |          |
| Propagule                                   | Weeks after planting |          |          |          |          |          |
|                                             | 3                    | 6        | 9        | 11       | 13       | 15       |
| Seed                                        | 7.1 bAB              | 2.8 bB   | 7.4 bAB  | 8.4 aA   | 7.5 aAB  | 8.2 aA   |
| Cutting                                     | 16.8 aA              | 15.9 aA  | 12.1 aA  | 5.6 aB   | 5.8 aB   | 4.6 bB   |
| Apigenin (mg per 100 g)#                    |                      |          |          |          |          |          |
| Propagule                                   | Weeks after planting |          |          |          |          |          |
|                                             | 3                    | 6        | 9        | 11       | 13       | 15       |
| Seed                                        | 3.1 bA               | 2.5 bA   | 2.6 aA   | 2.9 aA   | 3.2 aA   | 2.1 aA   |
| Cutting                                     | 10.2 aA              | 5.8 aB   | 2.1 aC   | 3.9 aBC  | 1.6 aC   | 2.1 aC   |

<sup>1</sup>Means followed by the same letter do not differ statistically according to the Tukey test at the 5% probability level. Lowercase letters indicate differences between methods of propagation within the same harvest date (column) and uppercase letters indicate differences among different dates of harvesting within the same propagation method (row). #Interaction effect not statistically significant.

**Table S8.** Unfolding of interaction effects between propagation methods and harvest times on contents of caffeic acid (Ca), rosmarinic acid (Ra), luteolin (Lu) and apigenin (Ap) in catnip plants. Upper Deerfield, State of New Jersey, United States.

| Caffeic acid (mg per 100 g)#                |                      |           |         |          |           |           |
|---------------------------------------------|----------------------|-----------|---------|----------|-----------|-----------|
| Propagule                                   | Weeks after planting |           |         |          |           |           |
|                                             | 3                    | 6         | 9       | 11       | 13        | 15        |
| Seed                                        | 9.3                  | 11.2      | 7.3     | 13.8     | 14.6      | 13.2      |
| Cutting                                     | 12.1                 | 10.9      | 10.2    | 11.2     | 15.1      | 10.4      |
| Rosmarinic acid (mg per 100 g) <sup>1</sup> |                      |           |         |          |           |           |
| Propagule                                   | Weeks after planting |           |         |          |           |           |
|                                             | 3                    | 6         | 9       | 11       | 13        | 15        |
| Seed                                        | 42.1 bCD             | 46.9 aBCD | 24.6 aD | 158.7 aA | 78.4 bBC  | 93.7 bB   |
| Cutting                                     | 108.8 aB             | 35.7 aC   | 31.1 aC | 162.3 aA | 137.2 aAB | 131.6 aAB |
| Luteolin (mg per 100 g)#                    |                      |           |         |          |           |           |
| Propagule                                   | Weeks after planting |           |         |          |           |           |
|                                             | 3                    | 6         | 9       | 11       | 13        | 15        |
| Seed                                        | 4.1                  | 2.9       | 3.3     | 4.2      | 2.6       | 8.3 aA    |
| Cutting                                     | 1.1                  | 3.5       | 5.1     | 4.0      | 6.2       | 11.2 aA   |
| Apigenin (mg per 100 g)#                    |                      |           |         |          |           |           |
| Propagule                                   | Weeks after planting |           |         |          |           |           |
|                                             | 3                    | 6         | 9       | 11       | 13        | 15        |
| Seed                                        | 2.2                  | 1.5       | 1.5     | 1.8      | 1.5       | 4.9       |
| Cutting                                     | 1.4                  | 5.7       | 1.6     | 1.4      | 5.7       | 5.6       |

<sup>1</sup>Means followed by the same letter do not differ statistically according to the Tukey test at the 5% probability level. Lowercase letters indicate differences between methods of propagation within the same harvest date (column) and uppercase letters indicate differences among different dates of harvesting within the same propagation method (row). #Interaction effect not statistically significant.

### Supplementary materials

Gomes et al. (2024).

Implications of propagation method on the phytochemistry of *Nepeta cataria* L. throughout a growing season

**Table S9.** Analysis of variance (ANOVA) table for contents of luteolin glucoside (LuGLS), apigenin glucoside (ApGLS), luteolin glucuronide (LuGLR), apigenin glucuronide (ApGLR), luteolin diglucuronide (LuGD) and apigenin diglucuronide (ApDG) in catnip plants propagated by different methods and harvested at different times within the growing season. Pittstown, State of New Jersey, United States.

| Source of variation | DF | Sum of squares       |                    |                      |                    |                     |                   |
|---------------------|----|----------------------|--------------------|----------------------|--------------------|---------------------|-------------------|
|                     |    | LuGLS                | ApGLS              | LuGLR                | ApGLR              | LuDG                | ApDG              |
| Blocks              | 2  | 1765.9 <sup>ns</sup> | 49.9 <sup>ns</sup> | 697.9 <sup>ns</sup>  | 23.6 <sup>ns</sup> | 737.5 <sup>ns</sup> | 7.6 <sup>ns</sup> |
| Propagule (p)       | 1  | 35774.5*             | 31.1 <sup>ns</sup> | 2534.7 <sup>ns</sup> | 17.7 <sup>ns</sup> | 24123.8*            | 0.8 <sup>ns</sup> |
| Whole-Plot error    | 2  | 912.4                | 30.7               | 332.3                | 4.8                | 733.1               | 8.2               |
| Weeks (w)           | 5  | 101656.6**           | 4979.5**           | 57980.2**            | 2849.8**           | 90265.9**           | 2827.5**          |
| Interaction p×w     | 5  | 35824.1**            | 2691.8**           | 54592.7**            | 1182.6**           | 17995.3**           | 675.6**           |
| Split-Plot Error    | 20 | 4647.7               | 387.2              | 3502.0               | 94.6               | 3055.3              | 119.6             |
| Total               | 35 | 180581.4             | 8170.3             | 119639.8             | 4173.3             | 136910.9            | 3639.5            |

\* Statistically significant ( $p \leq 0.05$ ); \*\* Statistically significant ( $p \leq 0.01$ ); <sup>ns</sup> Not statistically different ( $p > 0.05$ ); DF: degrees of freedom.

**Table S10.** Analysis of variance (ANOVA) table for contents of luteolin glucoside (LuGLS), apigenin glucoside (ApGLS), luteolin glucuronide (LuGLR), apigenin glucuronide (ApGLR), luteolin diglucuronide (LuGD) and apigenin diglucuronide (ApDG) in catnip plants propagated by different methods and harvested at different times within the growing season. Upper Deerfield, State of New Jersey, United States.

| Source of variation | DF | Sum of squares       |                    |                      |                    |                     |                    |
|---------------------|----|----------------------|--------------------|----------------------|--------------------|---------------------|--------------------|
|                     |    | LuGLS                | ApGLS              | LuGLR                | ApGLR              | LuDG                | ApDG               |
| Blocks              | 2  | 2297.9 <sup>ns</sup> | 41.6 <sup>ns</sup> | 370.8 <sup>ns</sup>  | 6.2 <sup>ns</sup>  | 549.8 <sup>ns</sup> | 22.1 <sup>ns</sup> |
| Propagule (p)       | 1  | 156.4 <sup>ns</sup>  | 26.6 <sup>ns</sup> | 1457.3 <sup>ns</sup> | 18.6 <sup>ns</sup> | 272.9 <sup>ns</sup> | 21.3 <sup>ns</sup> |
| Whole-Plot error    | 2  | 1826.5               | 146.3              | 1729.2               | 41.5               | 1196.2              | 24.3               |
| Weeks (w)           | 5  | 135872.2**           | 1355.6**           | 53069.9**            | 1582.5**           | 103053.4**          | 723.8**            |
| Interaction p×w     | 5  | 19330.5**            | 424.6*             | 33474.4**            | 1055.1**           | 20875.3**           | 510.4**            |
| Split-Plot Error    | 20 | 17095.7              | 492.8              | 6479.8               | 168.6              | 5361.1              | 355.8              |
| Total               | 35 | 176579.3             | 2487.6             | 96581.7              | 2872.6             | 131308.7            | 1657.7             |

\* Statistically significant ( $p \leq 0.05$ ); \*\* Statistically significant ( $p \leq 0.01$ ); <sup>ns</sup> Not statistically different ( $p > 0.05$ ); DF: degrees of freedom.

### Supplementary materials

Gomes et al. (2024).

Implications of propagation method on the phytochemistry of *Nepeta cataria* L. throughout a growing season

**Table S11.** Analysis of variance (ANOVA) table for contents of luteolin glucoside, apigenin glucoside, luteolin glucuronide, apigenin glucuronide, luteolin diglucuronide and apigenin diglucuronide in catnip plants propagated by different methods and harvested at different times within the growing season. Pittstown, State of New Jersey, United States.

| <b>Luteolin glucoside (mg per 100 g)<sup>1</sup></b>    |                             |          |          |          |          |          |
|---------------------------------------------------------|-----------------------------|----------|----------|----------|----------|----------|
| <i>Propagule</i>                                        | <i>Weeks after planting</i> |          |          |          |          |          |
|                                                         | 3                           | 6        | 9        | 11       | 13       | 15       |
| Seed                                                    | 129.4 aC                    | 285.1 aA | 257.9 aA | 195.4 aB | 179.7 aB | 73.5 bD  |
| Cutting                                                 | 121.0 aB                    | 233.1 bA | 92.4 bB  | 94.9 bB  | 98.6 bB  | 102.8 aB |
| <b>Apigenin glucoside (mg per 100 g)</b>                |                             |          |          |          |          |          |
| <i>Propagule</i>                                        | <i>Weeks after planting</i> |          |          |          |          |          |
|                                                         | 3                           | 6        | 9        | 11       | 13       | 15       |
| Seed                                                    | 4.5 aBC                     | 7.7 bBC  | 38.8 aA  | 38.9 aA  | 14.2 aB  | 2.6 aC   |
| Cutting                                                 | 5.1 aB                      | 39.3 aA  | 14.0 bB  | 29.6 bA  | 3.4 bB   | 4.2 aB   |
| <b>Luteolin glucuronide (g per plant)</b>               |                             |          |          |          |          |          |
| <i>Propagule</i>                                        | <i>Weeks after planting</i> |          |          |          |          |          |
|                                                         | 3                           | 6        | 9        | 11       | 13       | 15       |
| Seed                                                    | 27.7 aB                     | 57.9 bB  | 160.1 aA | 142.9 aA | 143.7 aA | 29.4 aB  |
| Cutting                                                 | 27.0 aD                     | 187.1 aA | 72.5 bBC | 100.5 bB | 34.9 bD  | 38.9 aCD |
| <b>Apigenin glucuronide (mg per plant)</b>              |                             |          |          |          |          |          |
| <i>Propagule</i>                                        | <i>Weeks after planting</i> |          |          |          |          |          |
|                                                         | 3                           | 6        | 9        | 11       | 13       | 15       |
| Seed                                                    | 3.8 aC                      | 18.3 bB  | 28.8 aA  | 27.6 aA  | 16.3 aB  | 6.0 aC   |
| Cutting                                                 | 6.5 aC                      | 38.7 aA  | 14.9 bB  | 19.2 bB  | 5.8 bC   | 7.4 aC   |
| <b>Luteolin diglucuronide (g per plant)<sup>1</sup></b> |                             |          |          |          |          |          |
| <i>Propagule</i>                                        | <i>Weeks after planting</i> |          |          |          |          |          |
|                                                         | 3                           | 6        | 9        | 11       | 13       | 15       |
| Seed                                                    | 130.8 aC                    | 231.6 aA | 184.9 aB | 91.9 aD  | 55.6 aE  | 48.9 aE  |
| Cutting                                                 | 104.2 bB                    | 146.3 bA | 50.7 bC  | 49.4 bC  | 41.76 aC | 40.8 aC  |
| <b>Apigenin diglucuronide (mg per plant)</b>            |                             |          |          |          |          |          |
| <i>Propagule</i>                                        | <i>Weeks after planting</i> |          |          |          |          |          |
|                                                         | 3                           | 6        | 9        | 11       | 13       | 15       |
| Seed                                                    | 12.6 bC                     | 27.3 bA  | 30.9 aA  | 20.5 aB  | 13.7 aC  | 8.6 aC   |
| Cutting                                                 | 16.8 aB                     | 42.0 aA  | 17.6 bB  | 19.4 aB  | 7.7 bC   | 8.4 aC   |

<sup>1</sup>Means followed by the same letter do not differ statistically according to the Tukey test at the 5% probability level. Lowercase letters indicate differences between methods of propagation within the same harvest date (column) and uppercase letters indicate differences among different dates of harvesting within the same propagation method (row).

## Supplementary materials

Gomes et al. (2024).

Implications of propagation method on the phytochemistry of *Nepeta cataria* L. throughout a growing season



**Table S12.** Analysis of variance (ANOVA) table for contents of luteolin glucoside, apigenin glucoside, luteolin glucuronide, apigenin glucuronide, luteolin diglucuronide and apigenin diglucuronide in catnip plants propagated by different methods and harvested at different times within the growing season. Upper Deerfield, State of New Jersey, United States.

| <b>Luteolin glucoside (mg per 100 g)<sup>1</sup></b>    |                             |          |           |           |          |          |
|---------------------------------------------------------|-----------------------------|----------|-----------|-----------|----------|----------|
| <i>Propagule</i>                                        | <i>Weeks after planting</i> |          |           |           |          |          |
|                                                         | 3                           | 6        | 9         | 11        | 13       | 15       |
| Seed                                                    | 242.2 aA                    | 88.9 bB  | 113.9 aB  | 265.4 aA  | 266.7 aA | 127.2 aB |
| Cutting                                                 | 213.8 aAB                   | 166.4 aB | 148.6 aBC | 209.4 bAB | 255.1 aA | 85.7 aC  |
| <b>Apigenin glucoside (mg per 100 g)</b>                |                             |          |           |           |          |          |
| <i>Propagule</i>                                        | <i>Weeks after planting</i> |          |           |           |          |          |
|                                                         | 3                           | 6        | 9         | 11        | 13       | 15       |
| Seed                                                    | 20.4 aA                     | 6.8 aB   | 5.8 aB    | 21.8 aA   | 9.9 aAB  | 3.7 aB   |
| Cutting                                                 | 3.6 bB                      | 5.4 aB   | 7.6 aB    | 24.0 aA   | 12.0 aAB | 5.5 aB   |
| <b>Luteolin glucuronide (mg per plant)</b>              |                             |          |           |           |          |          |
| <i>Propagule</i>                                        | <i>Weeks after planting</i> |          |           |           |          |          |
|                                                         | 3                           | 6        | 9         | 11        | 13       | 15       |
| Seed                                                    | 205.3 aA                    | 32.5 aC  | 44.1 aC   | 119.9 aB  | 49.8 bC  | 25.4 aC  |
| Cutting                                                 | 60.3 bBC                    | 40.3 aC  | 55.6 aBC  | 111.5 aA  | 91.5 aAB | 41.4 aC  |
| <b>Apigenin glucuronide (mg per plant)</b>              |                             |          |           |           |          |          |
| <i>Propagule</i>                                        | <i>Weeks after planting</i> |          |           |           |          |          |
|                                                         | 3                           | 6        | 9         | 11        | 13       | 15       |
| Seed                                                    | 41.3 aA                     | 10.9 aC  | 14.9 aBC  | 22.3 aB   | 12.2 bC  | 9.4 aC   |
| Cutting                                                 | 16.1 bBC                    | 14.2 aBC | 17.7 aB   | 25.8 aA   | 19.2 aAB | 9.2 aC   |
| <b>Luteolin diglucuronide (g per plant)<sup>1</sup></b> |                             |          |           |           |          |          |
| <i>Propagule</i>                                        | <i>Weeks after planting</i> |          |           |           |          |          |
|                                                         | 3                           | 6        | 9         | 11        | 13       | 15       |
| Seed                                                    | 254.7 aA                    | 106.2 bC | 101.3 bC  | 111.9 aC  | 163.6 aB | 56.3 aD  |
| Cutting                                                 | 203.3 bA                    | 159.5 aB | 155.8 aBC | 115.5 aCD | 91.6 bD  | 35.1 aE  |
| <b>Apigenin diglucuronide (mg per plant)</b>            |                             |          |           |           |          |          |
| <i>Propagule</i>                                        | <i>Weeks after planting</i> |          |           |           |          |          |
|                                                         | 3                           | 6        | 9         | 11        | 13       | 15       |
| Seed                                                    | 32.4 aA                     | 12.7 aB  | 17.5 aB   | 17.5 bB   | 13.1 bB  | 12.6 aB  |
| Cutting                                                 | 19.2 bAB                    | 18.8 aAB | 19.7 aAB  | 25.8 aA   | 21.0 aAB | 10.6 aB  |

<sup>1</sup>Means followed by the same letter do not differ statistically according to the Tukey test at the 5% probability level. Lowercase letters indicate differences between methods of propagation within the same harvest date (column) and uppercase letters indicate differences among different dates of harvesting within the same propagation method (row).

### Supplementary materials

Gomes et al. (2024).

Implications of propagation method on the phytochemistry of *Nepeta cataria* L. throughout a growing season

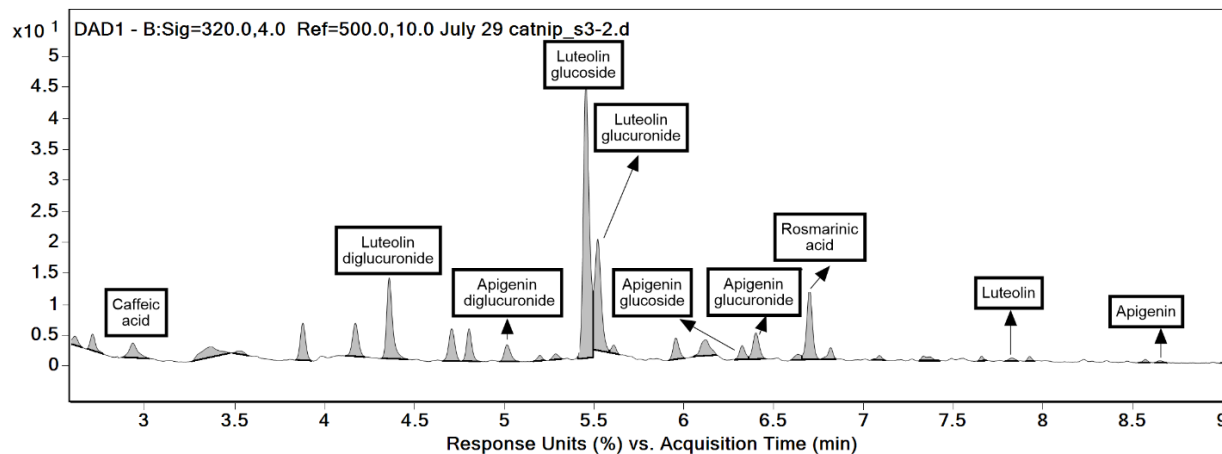

**Figure S1.** Representative UHPLC-DAD chromatogram (320 nm) of phenolic compounds in the methanolic extracts of *Nepeta cataria* L. aerial parts.

#### Supplementary materials

Gomes et al. (2024).

Implications of propagation method on the phytochemistry of *Nepeta cataria* L. throughout a growing season

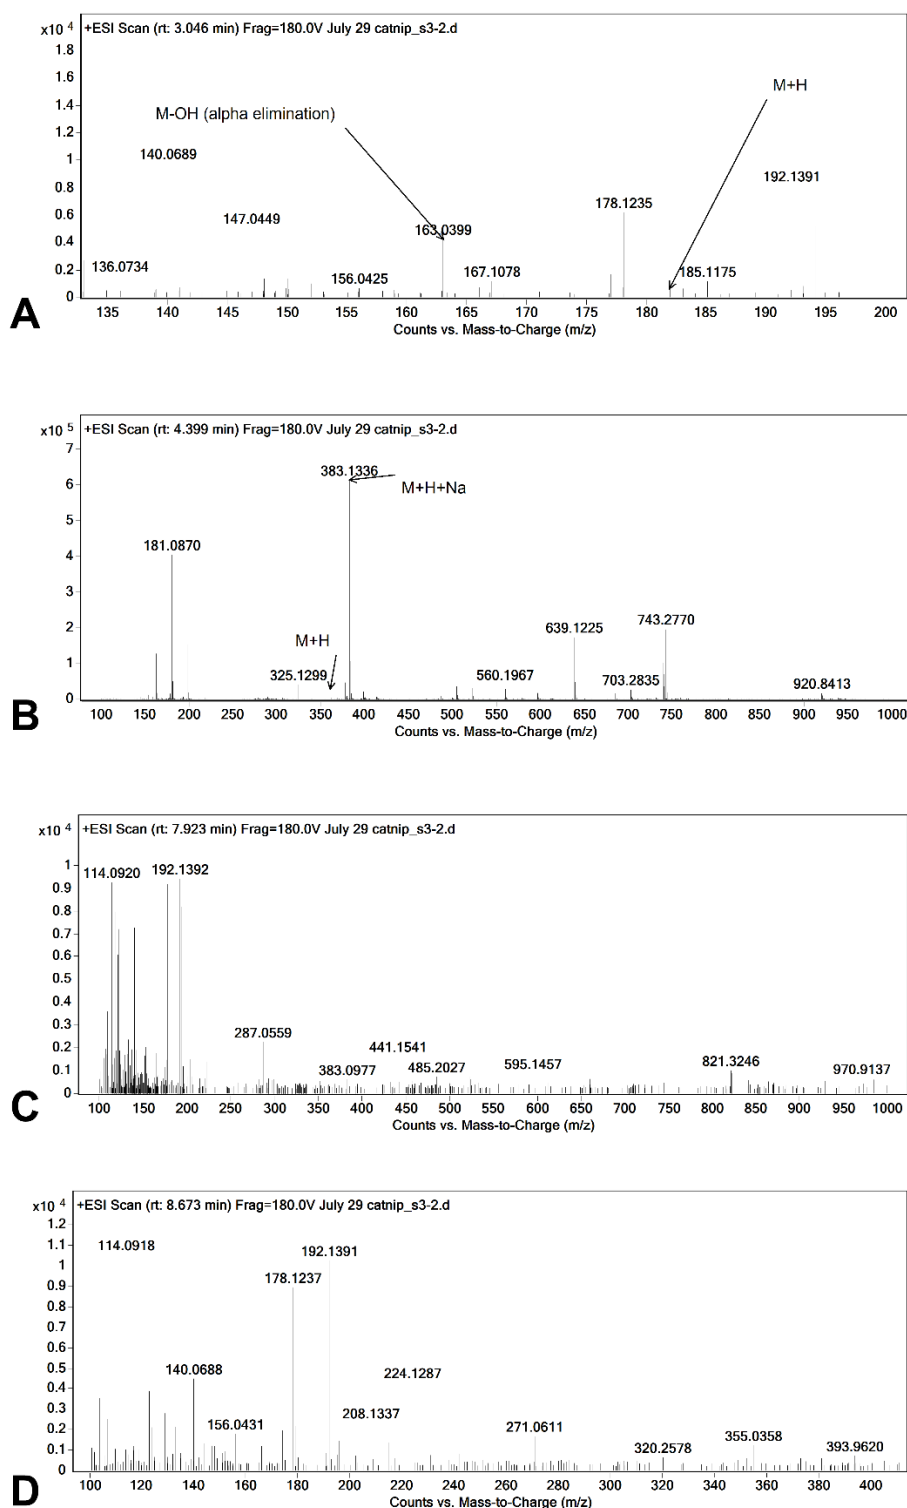

**Figure S2:** Mass spectra of caffeic acid (A), rosmarinic acid (B), luteolin (C), and apigenin (D) in methanolic extracts of *Nepeta cataria* L. aerial parts.

### Supplementary materials

Gomes et al. (2024).

Implications of propagation method on the phytochemistry of *Nepeta cataria* L. throughout a growing season

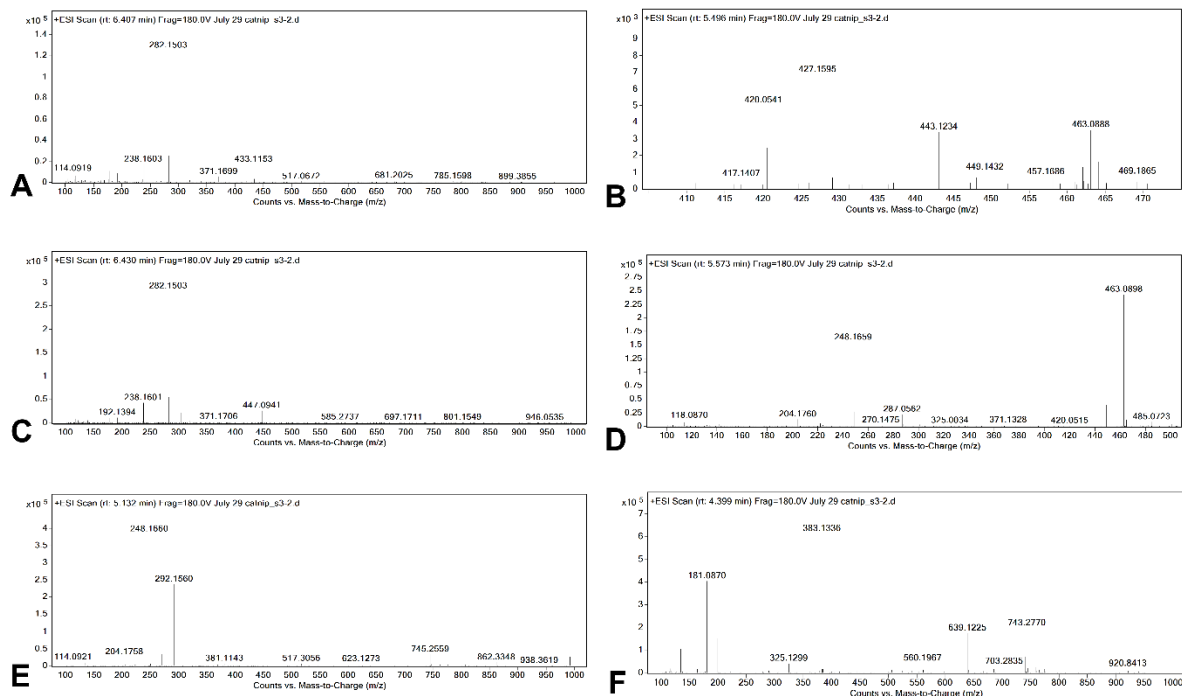

**Figure S3:** Mass spectra of apigenin glucoside (A), luteolin glucoside (B), apigenin glucuronide (C), luteolin glucuronide (D), apigenin diglucuronide (E), and luteolin diglucuronide (F) in methanolic extracts of *Nepeta cataria* L. aerial parts.

**Table S13.** Results of Brown-Forsythe (homogeneity of variances) and Kolmogorov-Smirnov (normal distribution of residuals) tests on original and transformed data of different variables of catnip plants propagated by different methods and harvested at different times within the growing season. Pittstown, State of New Jersey, United States.

| Variables                 | Pittstown                         |                                   |                            |                                      |                                   |                            |
|---------------------------|-----------------------------------|-----------------------------------|----------------------------|--------------------------------------|-----------------------------------|----------------------------|
|                           | Brown– Forsythe test <sup>1</sup> |                                   |                            | Kolmogorov-Smirnov test <sup>2</sup> |                                   |                            |
|                           | Original data                     | Transformed to $Y=\text{Log2}(Y)$ | Transformed to $Y=\sin(Y)$ | Original data                        | Transformed to $Y=\text{Log2}(Y)$ | Transformed to $Y=\sin(Y)$ |
| Z,E-nepetalactone         | ns                                | ns                                | ns                         | ns                                   | n.a.                              | n.a.                       |
| E,Z-nepetalactone         | ns                                | ns                                | ns                         | ns                                   | n.a.                              | n.a.                       |
| Total nepetalactone       | ns                                | ns                                | ns                         | ns                                   | n.a.                              | n.a.                       |
| Biomass                   | ns                                | ns                                | ns                         | ns                                   | n.a.                              | n.a.                       |
| Total nepetalactone yield | ns                                | ns                                | ns                         | *                                    | ns                                | n.a.                       |
| Nepetalic acid            | ns                                | ns                                | ns                         | ns                                   | n.a.                              | n.a.                       |
| Dihydronepetalactone      | ns                                | ns                                | ns                         | ns                                   | n.a.                              | n.a.                       |
| Nepetalactam              | ns                                | ns                                | ns                         | ***                                  | ns                                | n.a.                       |
| Caffeic acid              | ns                                | ns                                | ns                         | ns                                   | n.a.                              | n.a.                       |
| Rosmarinic acid           | ns                                | ns                                | ns                         | *                                    | ns                                | n.a.                       |
| Apigenin                  | ns                                | ns                                | ns                         | ***                                  | ***                               | ns                         |
| Luteolin                  | ns                                | ns                                | ns                         | ns                                   | n.a.                              | n.a.                       |
| Apigenin glucoside        | ns                                | ns                                | ns                         | ***                                  | ***                               | ns                         |
| Luteolin glucoside        | ns                                | ns                                | ns                         | **                                   | ns                                | n.a.                       |
| Apigenin glucuronide      | ns                                | ns                                | ns                         | **                                   | ***                               | ns                         |
| Luteolin glucuronide      | ns                                | ns                                | ns                         | ns                                   | n.a.                              | n.a.                       |
| Apigenin diglucuronide    | ns                                | ns                                | ns                         | ns                                   | n.a.                              | n.a.                       |
| Luteolin diglucuronide    | ns                                | ns                                | ns                         | ***                                  | ns                                | n.a.                       |

<sup>1</sup>Testing the null hypothesis that the variances of the populations are homogenous. <sup>2</sup>Testing the null hypothesis that the residuals are normally distributed. ns: not significant, the null hypothesis was not rejected. \*Null hypothesis rejected at the 5% probability level. \*\*Null hypothesis rejected at 1% probability level \*\*\*Null hypothesis rejected at 0.1% probability level. n.a.: not applicable.

### Supplementary materials

Gomes et al. (2024).

Implications of propagation method on the phytochemistry of *Nepeta cataria* L. throughout a growing season

**Table S14.** Results of Brown-Forsythe (homogeneity of variances) and Kolmogorov-Smirnov (normal distribution of residuals) tests on original and transformed data of different variables of catnip plants propagated by different methods and harvested at different times within the growing season. Upper Deerfield, State of New Jersey, United States.

| Upper Deerfield           |                                   |                                    |                            |                                      |                                    |                            |
|---------------------------|-----------------------------------|------------------------------------|----------------------------|--------------------------------------|------------------------------------|----------------------------|
| Variables                 | Brown– Forsythe test <sup>1</sup> |                                    |                            | Kolmogorov-Smirnov test <sup>2</sup> |                                    |                            |
|                           | Original data                     | Transformed to $Y=\text{Log}_2(Y)$ | Transformed to $Y=\sin(Y)$ | Original data                        | Transformed to $Y=\text{Log}_2(Y)$ | Transformed to $Y=\sin(Y)$ |
| Z,E-nepetalactone         | ns                                | ns                                 | ns                         | *                                    | ns                                 | n.a.                       |
| E,Z-nepetalactone         | ns                                | ns                                 | ns                         | ns                                   | n.a.                               | n.a.                       |
| Total nepetalactone       | ns                                | ns                                 | ns                         | ns                                   | n.a.                               | n.a.                       |
| Biomass                   | ns                                | ns                                 | ns                         | ns                                   | n.a.                               | n.a.                       |
| Total nepetalactone yield | ns                                | ns                                 | ns                         | *                                    | ns                                 | n.a.                       |
| Nepetalic acid            | ns                                | ns                                 | ns                         | ns                                   | n.a.                               | n.a.                       |
| Dihydronepetalactone      | ns                                | ns                                 | ns                         | ns                                   | n.a.                               | n.a.                       |
| Nepetalactam              | ns                                | ns                                 | ns                         | *                                    | ns                                 | n.a.                       |
| Caffeic acid              | ns                                | ns                                 | ns                         | *                                    | ns                                 | n.a.                       |
| Rosmarinic acid           | ns                                | ns                                 | ns                         | *                                    | ns                                 | n.a.                       |
| Apigenin                  | ns                                | ns                                 | ns                         | ns                                   | n.a.                               | n.a.                       |
| Luteolin                  | ns                                | ns                                 | ns                         | *                                    | ns                                 | n.a.                       |
| Apigenin glucoside        | ns                                | ns                                 | ns                         | **                                   | **                                 | ns                         |
| Luteolin glucoside        | ns                                | ns                                 | ns                         | *                                    | ns                                 | n.a.                       |
| Apigenin glucuronide      | ns                                | ns                                 | ns                         | **                                   | ns                                 | n.a.                       |
| Luteolin glucuronide      | ns                                | ns                                 | ns                         | ns                                   | n.a.                               | n.a.                       |
| Apigenin diglucuronide    | ns                                | ns                                 | ns                         | ***                                  | ***                                | ns                         |
| Luteolin diglucuronide    | ns                                | ns                                 | ns                         | ns                                   | n.a.                               | n.a.                       |

<sup>1</sup>Testing the null hypothesis that the variances of the populations are homogenous. <sup>2</sup>Testing the null hypothesis that the residuals are normally distributed. ns: not significant, the null hypothesis was not rejected. \*Null hypothesis rejected at the 5% probability level. \*\*Null hypothesis rejected at 1% probability level \*\*\*Null hypothesis rejected at 0.1% probability level. n.a.: not applicable.

### Supplementary materials

Gomes et al. (2024).

Implications of propagation method on the phytochemistry of *Nepeta cataria* L. throughout a growing season
